# Biophysical basis of alpha rhythm disruption in Alzheimer's disease

Rohan Sharma<sup>1</sup> and Suhita Nadkarni<sup>1\*</sup>

**1** Biology Department, Indian Institute of Science Education and Research - Pune,  
Pune, Maharashtra, India

These authors contributed equally to this work.

\*suhita@iiserpune.ac.in

## Abstract

Alpha is one of the most prominent rhythms (7.5–12.5 Hz) detected in electroencephalography (EEG) during wakeful relaxation with closed eyes. In response to elevated ambient acetylcholine levels, a subclass of thalamic pacemaker cells generate alpha. This rhythm is intrinsic to the cell and is robustly orchestrated by an interplay of hyperpolarization activated cyclic nucleotide gated channels(HCN) and calcium-ion channels. It has been shown that decreased expression of HCN channels is correlated to Alzheimer's Disease (AD). In early stages of AD, alpha is known to be down-regulated and lowered in coherence. We use this well characterized and quantified rhythm to understand the changes in ion channel properties that lead to disruption of alpha as seen in AD in a biophysically detailed network model of the thalamo-cortical circuit that generates the alpha-rhythm. Our computational model allows us to explore the causal links between alpha rhythms, HCN channels and amyloid-beta aggregation. The most commonly used drugs(acetylcholinesterase inhibitors) in AD increase the duration and level of acetylcholine and provide temporary symptomatic relief in some cases. Our simulations show how increasing acetylcholine can provide rescue for a small range of aberrant HCN expression. We hypothesize that reduced alpha rhythm frequency and coherence is a result of down-regulated HCN expression, rather than compromised cholinergic modulation(as is currently thought). The model predicts that lowering of the alpha-rhythm can modify the network activity in the thalamo-cortical circuit and lead to an increase in the inhibitory drive to the thalamus.

## 1 Introduction

It is widely agreed that rhythms play a vital role in coordinating and organizing neuronal computations across various anatomical regions of the brain. Robust and sustained rhythms, from a fraction of a hertz (delta) to several hundred hertz, have been implicated in a range of functions, like attention, spatial navigation and memory consolidation. The alpha-rhythm in particular has been associated with the cognitive function of attention (selection and suppression) and semantic orientation [1]. Typically, network mechanisms that invoke interplay between inhibitory and excitatory cells lead to genesis of rhythms that are robust as well flexible in response to ongoing functional requirements [2]. Gamma rhythms, for instance, are generated by synaptic interactions between inhibitory neurons and excitatory pyramidal neurons, the so called pyramidal interneuron gamma (PING) [3]. Alpha rhythms, on the other hand, are an intrinsic

43 property of neurons in the thalamus; blocking chemical synaptic transmission does not  
44 block alpha [4]. The alpha rhythm generated in the thalamus is the result of  
45 synchronous bursting of neurons, each firing at a frequency within the alpha range.  
46 They maintain stable phase relationships because of tight gap junction coupling.  
47 Studies also suggest that cortical neurons too can generate alpha [5]. Alpha-rhythm  
48 activity has also been observed in other brain regions like the the pre-frontal [6],  
49 auditory [7] and somatosensory cortex [8]. In response to a discrimination task a  
50 reduction in the amplitude of the peak at 10Hz is observed, along with the emergence of  
51 a low amplitude peak at 20Hz [9]. This suggests that the coherence and frequency  
52 changes in alpha are functionally relevant attributes.

53 Here we have used a biophysically detailed, conductance based network model of  
54 neurons in the thalamus associated with alpha generation [10]. The model comprises of  
55 a set of specialized thalamic cells, with a high threshold calcium current (HTC cells),  
56 which fire at alpha frequency(10Hz) during high levels of ambient acetylcholine that  
57 activate muscarinic acetylcholine receptor(mAChR) [4]. This is modeled as a lowered  
58 potassium leak conductance  $g_{Kleak}$  Eq:1 [10, 11]. Each of these cells are connected via  
59 gap junction to ensure synchronous activity. Even though the rhythm generation is  
60 limited to the HTC cells, they are not isolated from the rest of the thalamic network.  
61 Our model utilizes a minimal network motif which follows physiologically realistic ratios  
62 of inputs and outputs associated with the thalamus 1, including the HTC cells and their  
63 synaptic interactions. This minimal network allows us to explore the effects of the HTC  
64 cell firing on the rest of the network and the effect of the network firing on the HTC  
65 cells. It consists of two HTC cells connected to each other via a gap junction, which  
66 provide an excitatory drive to the RE cells and TC cells. The TC cells are excitatory  
67 and connect to all RE cells but not to each other or the HTC cells. The RE cells are  
68 GABAergic and inhibit every other cell in the network, including other RE cells 1.

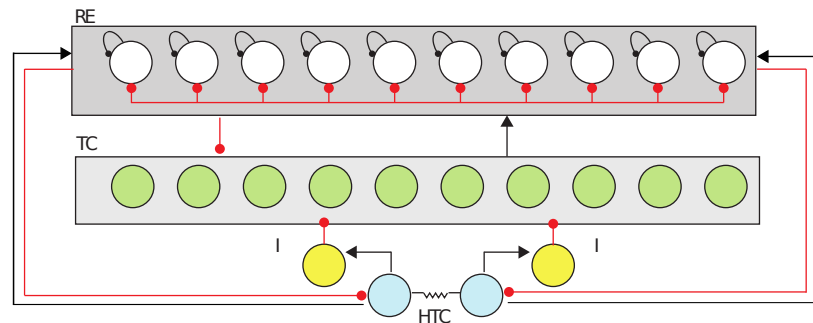

**Fig 1. Thalamocortical Network involved in Alpha generation.** The RE cells (white) mutually inhibit each other and inhibit all of the TC cells (green). The TC cells send excitatory connections to all of the RE cells. There are no direct mutual connections between TC cells. The HTC cells (blue) are solely responsible for generating the alpha rhythm inhibit the TC cells via sending excitatory drive to the inhibitory-interneurons (yellow). The ratio of the RE to TC cells is 1:1 and 20% of the TC cells are HTC cells. The inhibitory interneurons are modeled implicitly, using a synaptic delay. Gap-junctions between the HTC cells enable synchronized bursting.

69 The causal link of events that chronicle the activity of ionic currents pivotal to the  
70 generation of alpha-activity, leading to initiation and termination of the rhythm in the  
71 presence of acetylcholine is described in 2. High threshold calcium ion channels and a  
72 nonspecific (for ions) hyperpolarization activated cyclic-nucleotide gated(HCN) channels  
73 are the ionic components of HTC cells that govern alpha. The precision and robustness  
74 of the rhythm is determined by the intrinsic dynamics of the gating variable of each

75 current and the interplay between the currents mediated by membrane voltage and  
76 calcium. After each burst of action potentials, the cell undergoes a brief  
77 hyperpolarization, which activates the HCN channels. The slow positive inward current  
78 due to opening of HCNs then steadily depolarizes the cell till the opening threshold of  
79 the calcium channel is reached. This calcium channel is favored with an instantaneous  
80 activating rate and a slow inactivating rate. They also have a narrow regime of voltage  
81  $\sim(-50\text{mV to }-10\text{mV})$  over which they are open. The calcium current causes rapid  
82 depolarization, triggering the fast sodium and potassium channels in the presence of  
83 high levels of acetylcholine ( $g_{Kleak}$ ) and generate a series of action potentials. The  
84 sluggish response of inactivating gate of the calcium channel to the ongoing action  
85 potential causes a slow decay of this current. The decay eventually terminates the  
86 action potential burst, allowing potassium channel to repolarize the membrane. As the  
87 membrane repolarizes, the HCN channels start getting activated, setting up the system  
88 for another burst. The depolarization time scale sets the time interval between bursts  
89 and defines the alpha rhythm. The depolarization time scale is determined by the  
90 magnitude of the  $I_H$  current, which in turn depends on the HCN channels' conductance  
91 and expression.

92 Neurological disorders like Alzheimer's Disease (AD), other forms of dementia,  
93 Parkinson's disease etc. all have characteristic signatures in EEG recordings [12].  
94 AD patients in particular show diminished power and down-regulated frequency in the  
95 alpha band [13] [14]. In the computational model described here and in slice studies [4],  
96 the alpha frequency and power is keenly modulated by ambient concentration levels of  
97 acetylcholine. A class of drugs that inhibit the breakdown of  
98 acetylcholine (acetylcholinesterase inhibitors) and therefore augment its resting levels,  
99 provide temporary symptomatic relief. These observations portend an interesting  
100 correspondence of alpha, its disruption in AD and its downstream cognitive implications.

101 Individuals with a genetic risk of AD (APOE-4 carriers) have been shown to exhibit  
102 reduced grid-cell-like representation and have difficulties in navigating in familiar  
103 environments [15]. Grid cell representation in the entorhinal cortex has been shown to  
104 have a gradient along the dorso-ventral axis. As we move along the axis, the grid cell  
105 spacing increases. The grid cells themselves show a gradient in the bio-physical  
106 properties of the HCN1 channels. The HCN1 channels' expression and the time constant  
107 of activation increases along the dorso-ventral axis, while the size and spacing of grid  
108 cells increases in HCN1 knockout mice [16]. This association between grid cells and the  
109 bio-physical properties of HCN1 channels, suggests a close association of HCN1 channels  
110 with grid cells. We believe disrupted expression of HCN1 channels can be detrimental to  
111 the cognitive ability of a subject to perform spatial navigation. This makes us believe  
112 that the initial loss in the ability to perform spatial navigation in early stages OF AD  
113 arises out aberrations in the expression of HCN1 channels in the entorhinal cortex.  
114 Indeed lowered activity of HCN1 channels has been shown to increase the production of  
115  $A\beta$  from amyloid precursor proteins (APP) [17]. This suggests decreased amount of  
116 HCN channels could be an upstream event to  $A\beta$  production in AD neurons. There  
117 might lie an explanation of observed mild cognitive decline even before more prominent  
118 markers associated with AD like  $A\beta$  and Neurofibrillary Tangles (NFT) are seen [18].  
119 We systematically explore the consequence of reduced HCN channel activity on the  
120 alpha rhythm. Prompted by the therapeutic merit of acetylcholinesterase inhibitors and  
121 the role of acetylcholine in initiating the alpha rhythm, we also investigate the rescue of  
122 the alpha rhythm by increasing cholinergic modulation.

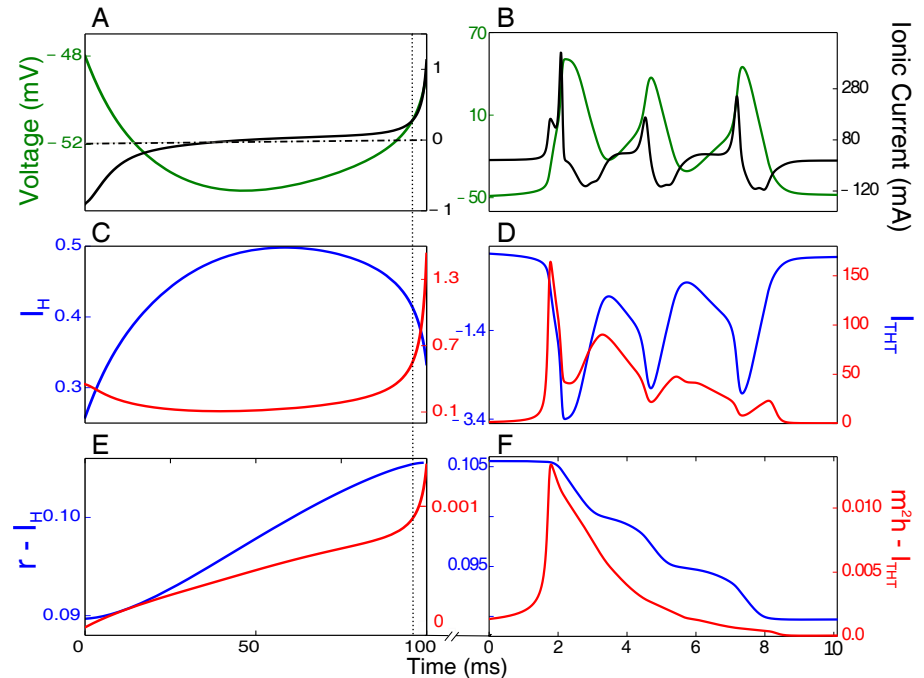

**Fig 2. Chronology of events underlying the alpha-rhythm** The bursting activity in alpha-rhythm is initiated by activation of  $I_H$  current (B) and terminated by repolarization with the potassium channel. The inter-burst interval determines the 10 Hz rhythm. The left panels describe slow dynamics between the burst over a 100ms time window. The right panels describe activity of ion channels during a burst over 10ms. (A) Slowly increasing membrane voltage (green) due to increase in  $I_H$  conductance (during repolarization of the membrane by potassium channel). The total current (black) increases with  $I_H$  (B) Time trace of the  $I_H$  current (blue) as it slowly activates during repolarization leading to the activation of the  $I_{THT}$  (red) close to the 90ms mark (dotted line) (C) Gating variables of the  $I_H$  ( $r_H$ ) and  $I_{THT}$  ( $m^2h$ ) currents. The high-threshold calcium current gets activated around the 90ms mark (dotted line) (D) Zoomed in to the first 10 ms after activation  $I_{THT}$ . Burst of action potentials are generated driven by membrane depolarization initiated by  $I_H$  and  $I_{THT}$  in that order. (E) The high-threshold calcium current provides the depolarizing impetus that sustains a burst of action potentials. (F) The slow decay of the gating variables of the  $I_H$  as the membrane potential rises above the activation voltage. The gating variables of  $I_{THT}$  slowly deactivate at the high voltages during action potentials.

## 123 Materials and Methods

### 124 Details of ionic currents associated with the neuron, synapses and the 125 network connections in the thalamo-cortical circuit that generates the 126 alpha-rhythm.

127 The model consists of the canonical point-neuron network model of the  
128 thalamo-cortical circuitry with the addition of a high-threshold T-type calcium current  
129 in 20% of the TC cells (HTC)1. The HTC cells receive a white-noise input with zero  
130 mean which was implemented using the Euler-Maruyama method. The TC and RE  
131 neurons receive a poisson-distributed train of excitatory and inhibitory impulses. The  
132 activation of the mACh receptors is phenomenologically modeled by lowering the  
133 potassium leak conductance [19] We used an in-house Computational Neuroscience

134 library written in C++ <https://github.com/insilico-lib/insilico> to do the simulations.  
 135 The time step of each simulation was taken to be 0.01ms.

## 136 Neurons

### 137 Thalamo-reticular(RE) neurons

$$C \frac{d\mathbf{V}_{RE}}{dt} = -I_{Na} - I_K - I_{TRE} - I_{KL} - I_L - I_{GABAA} - I_{AMPA} + I_{APP}$$

138 Potassium Current :

$$I_K = g_k n^4 (\mathbf{V} - E_K) \quad \frac{dn}{dt} = \frac{n_\infty(\mathbf{V}) - n}{\tau_n(\mathbf{V})}$$

139 here:

$$n_\infty(\mathbf{V}) = \frac{\alpha_n(\mathbf{V})}{\alpha_n(\mathbf{V}) + \beta_n(\mathbf{V})} \quad \tau_n(\mathbf{V}) = \frac{1}{\alpha_n(\mathbf{V}) + \beta_n(\mathbf{V})}$$

140 where:

$$\alpha_n = \frac{0.032(15 - \mathbf{V}_t)}{\exp((15 - \mathbf{V}_t)/5.0) - 1} \quad \beta_n = 0.5 \exp((10 - \mathbf{V}_t)/40)$$

$$141 \quad \mathbf{V}_t = \mathbf{V}_{RE} + 55, \quad g_K = 10 \text{ mS/cm}^2 \quad \text{and} \quad E_K = -100 \text{ mV}$$

142 Sodium Current :

143 The  $m_\infty$ ,  $\tau_m$ ,  $h_\infty$  and  $\tau_h$  have equations identical to the  $n_\infty$  and the  $\tau_n$  of the  
 144 potassium gate n.

$$I_{Na} = g_{Na} m^3 h (\mathbf{V} - E_{Na}), \quad \frac{dm}{dt} = \frac{m_\infty(\mathbf{V}) - m}{\tau_m(\mathbf{V})}, \quad \frac{dh}{dt} = \frac{h_\infty(\mathbf{V}) - h}{\tau_h(\mathbf{V})}$$

145 where:

$$\alpha_m = \frac{0.32(13 - \mathbf{V}_t)}{\exp((13 - \mathbf{V}_t)/4.0) - 1} \quad \beta_m = \frac{0.28(\mathbf{V}_t - 40)}{\exp((\mathbf{V}_t - 40)/5) - 1}$$

$$\alpha_h = 0.128 \exp((17 - \mathbf{V}_t)/18) \quad \beta_h = \frac{4}{\exp((40 - \mathbf{V}_t)/5) + 1}$$

$$146 \quad \mathbf{V}_t = \mathbf{V}_{RE} + 55, \quad g_{Na} = 100 \text{ mS/cm}^2 \quad \text{and} \quad E_{Na} = 50 \text{ mV}$$

147 Calcium Current :

$$I_T = g_{Ca} m^2 h (\mathbf{V} - E_{Ca}), \quad \frac{dm}{dt} = \frac{m_\infty(\mathbf{V}) - m}{\tau_m(\mathbf{V})}, \quad \frac{dh}{dt} = \frac{h_\infty(\mathbf{V}) - h}{\tau_h(\mathbf{V})}$$

148 where:

$$h_\infty = \frac{1}{1 + \exp((\mathbf{V} + 80.0)/5.0)}, \quad \tau_h = 28.307 + \frac{0.33}{\exp((\mathbf{V} + 48)/4) + \exp(-(\mathbf{V} + 407)/50)}$$

$$\frac{d[Ca]}{dt} = \frac{-10I_{TRE}}{2 \times 96489} + \frac{0.00024 - [Ca]}{3.0}$$

149 The first term must be positive, otherwise it is set to zero.  $g_{Ca} = 2.3 \text{ mS/cm}^2$  and the  
 150 reversal potential for calcium is calculated using the Nernst Equation

151 Leak Current :

$$I_L = g_L(\mathbf{V} - E_L) + g_{KL}(\mathbf{V} - E_{KL})$$

152 where:

$$g_L = 0.01 \text{ mS/cm}^2, E_L = -73, g_{KL} = 0.07 - 0.08 \text{ mS/cm}^2 \text{ and } E_{KL} = -100 \text{ mV}$$

153 Applied Current :

154 The applied current is a train of poisson-distributed excitatory and inhibitory impulses.

155 The details of the same will be discussed later.

156 **Thalamo-cortical(TC) neurons**

$$C \frac{d\mathbf{V}_{TC}}{dt} = -I_{Na} - I_K - I_{TLT} - I_{KL} - I_L - I_H - I_{GABA_A} - I_{GABA_B} + I_{APP}$$

157 Potassium Current :

158 It is very similar to the RE cell potassium current except :

$$159 \mathbf{V}_t = \mathbf{V}_{RE} + 25 \quad \text{and} \quad g_K = 10 \text{ mS/cm}^2$$

160 Sodium Current :

161 It is very similar to the RE cell sodium current except :

$$162 \mathbf{V}_t = \mathbf{V}_{RE} + 25 \quad \text{and} \quad g_{Na} = 90 \text{ mS/cm}^2$$

163 Low Threshold Calcium Current :

$$I_{TLT} = g_{Ca} m^2 h (\mathbf{V} - E_{Ca}), \quad m = m_{\infty}(\mathbf{V}), \quad \frac{dh}{dt} = \frac{h_{\infty}(\mathbf{V}) - h}{\tau_h(\mathbf{V})}$$

164 where:

$$m_{\infty}(\mathbf{V}) = \frac{1}{\exp(-(57 + \mathbf{V}_t)/6.2) + 1}$$

$$h_{\infty} = \frac{1}{1 + \exp((\mathbf{V}_t + 81.0)/4.0)}, \quad \tau_h = \frac{30.8 + \left( \frac{211.4 + \exp(\mathbf{V}_t + 113.2)/5.0}{1 + \exp(\mathbf{V}_t + 84.0)/3.2} \right)}{3.74}$$

$$\frac{d[Ca]}{dt} = \frac{-10I_{TLT}}{2 \times 96489} + \frac{0.00024 - [Ca]}{5.0}$$

165 The first term must be positive, otherwise it is set to zero.

166  $g_{Ca} = 2 \text{ mS/cm}^2$ ,  $\mathbf{V}_t = \mathbf{V} + 2$  and the reversal potential for calcium is calculated using  
167 the Nernst Equation

168 Leak Current :

$$I_L = g_L(\mathbf{V} - E_L) + g_{KL}(\mathbf{V} - E_{KL})$$

169 where:

$$g_L = 0.01 \text{ mS/cm}^2, E_L = -70 \text{ mV}, g_{KL} = 0.0028 \text{ mS/cm}^2, E_{KL} = -100 \text{ mV}$$

170 H-Current :

$$I_H = g_h(o + a \times (1 - c - o))(\mathbf{V} - E_h), \quad \frac{do}{dt} = 0.0001(1.0 - c - o) - 0.001((1.0 - p)/0.01),$$

171

$$\frac{dp}{dt} = 0.0004(1.0 - p) - 0.004 \left( \frac{[Ca]}{0.0002} \right)^2, \quad \frac{dc}{dt} = \beta_c o - \alpha_c c$$

172 where:

$$\alpha_c = \frac{h_\infty}{\tau_s}, \quad \beta_c = \frac{1 - h_\infty}{\tau_s}, \quad h_\infty = \frac{1}{1 + \exp((\mathbf{V} + 75)/5.5)},$$

173

$$\tau_s = 20 + \frac{1000}{\exp((\mathbf{V} + 71.5)/14.2) + \exp(-(\mathbf{V} + 89)/11.6)}$$

174  $g_h = 0.1 \text{ mS/cm}^2$ ,  $a = 2$  and  $E_h = -43 \text{ mV}$

175 Applied Current :

176 The applied current is a train of poisson-distributed excitatory and inhibitory impulses.  
177 The details of the same will be discussed later.

178 **High Threshold Thalamo-cortical(HTC) neurons**

179 Potassium Current :

180 The potassium current follows the same dynamics as the potassium current in TC cells

181 Sodium Current :

182 The sodium current follows the same dynamics as the potassium current in TC cells

183 Low Threshold Calcium Current : The low threshold calcium current follows the same  
184 dynamics as the potassium current in TC cells

185 High Threshold Calcium Current :

$$I_{HT} = g_{Ca} m^2 h (\mathbf{V} - E_{Ca}), \quad m = m_\infty(\mathbf{V}), \quad \frac{dh}{dt} = \frac{h_\infty(\mathbf{V}) - h}{\tau_h(\mathbf{V})}$$

186 where:

$$m_\infty(\mathbf{V}) = \frac{1}{\exp(-(\mathbf{V} + 40.1)/3.5) + 1}$$

$$h_\infty = \frac{1}{1 + \exp((\mathbf{V} + 62.2)/5.5)}, \quad \tau_h = 0.1483 \exp(-0.09398 \mathbf{V}) + 5.284 \exp(0.008855 \mathbf{V})$$

$$\frac{d[Ca]}{dt} = \frac{-10(I_{TLT} + I_{HT})}{2 \times 96489} + \frac{0.00024 - [Ca]}{3.0}$$

187 The first term must be positive, otherwise it is set to zero.

188  $g_{Ca} = 12 \text{ mS/cm}^2$  and  $E_{Ca}$  is calculated using the Nernst-equation

189 Leak Current :

$$I_L = g_L(\mathbf{V} - E_L) + g_{KL}(\mathbf{V} - E_{KL})$$

190 where:

$$g_L = 0.01 \text{mS/cm}^2, E_L = -70 \text{mV}, g_{KL} = 0.0069 \text{mS/cm}^2, E_{KL} = -100 \text{mV}$$

191 H-Current :

$$I_H = g_h r(\mathbf{V} - E_h), \quad \frac{dr}{dt} = \frac{r(\mathbf{V}) - r_\infty}{\tau_r(\mathbf{V})}$$

192 where:

$$r_\infty = \frac{1}{1 + \exp((\mathbf{V} + 60)/5.5)}, \quad \tau_r = 20 + \frac{1000}{\exp((\mathbf{V} + 56.5)/14.2) + \exp(-(\mathbf{V} + 74)/11.6)}$$

193  $g_h = 0.40 \text{mS/cm}^2$ , and  $E_h = -40 \text{mV}$

194 Calcium Activated Potassium Current :

$$I_{AHP} = g_{AHP} m^2 (\mathbf{V} - E_K), \quad \frac{dm}{dt} = \frac{m_\infty - m}{\tau_m}$$

195 where:

$$m_\infty = \frac{48[Ca]^2}{48[Ca]^2 + 0.09}$$

$$\tau_m = \frac{1}{48[Ca]^2 + 0.09}$$

196  $g_{AHP} = 15 \text{mS/cm}^2$  and  $E_K = -100 \text{mV}$

197 Gap Junction Current :

198  $I_{GJ} = g_{GJ}(\mathbf{V}_{HTC} - \mathbf{V}_{post})$ , where  $\mathbf{V}_{post}$  is the membrane potential of the neuron that  
199 is connected to this HTC neuron by a gap junction

$$g_{GJ} = 0.003 - 0.005 \text{mS/cm}^2$$

200 Applied Current :

201 The HTC neurons receive a Gaussian white noise with a mean around zero and standard  
202 deviation of 0.1

## 203 Synapses

204 AMPA:

$$I_{AMPA} = g_{AMPA}[R](\mathbf{V} - E_{AMPA}) \quad \frac{d[R]}{dt} = 0.98[T](1 - [R]) - 0.180[R]$$

205 [T] is the transmitter concentration. When a pre-synaptic cell experiences an action  
206 potential the transmitter concentration is increased to 0.5mM and stays there for 0.3ms for  
207 HTC and 0.5ms for TC cells. [R] represents the fraction of the receptors that are open.

$$E_{AMPA} = 0 \text{mV}$$



208

$$g_{AMPA} : HTC \Rightarrow RE = 0.001, TC \Rightarrow RE = 0.05$$

209

*GABA<sub>A</sub>*:

$$I_{GABA_A} = g_{GABA_A}[R](V - E_{GABA_A}) \quad \frac{d[R]}{dt} = 20[T](1 - [R]) - 0.180[R]$$

210

211

212

[T] is the neuro-transmitter concentration. When a pre-synaptic cell sees an action potential the transmitter concentration is increased to 0.5mM and stays there for 1.0ms for HTC and 0.3ms for RE cells. [R] represents the fraction of the receptors that are open.

213

$$E_{GABA_A} = -85mV, g_{GABA_A} : HTC \Rightarrow TC = 0.4 \text{ with a delay of } 10ms$$

$$RE \Rightarrow HTC = 0.0002, RE \Rightarrow TC = 0.002, RE \Rightarrow RE = 0.02$$

214

*GABA<sub>B</sub>*:

$$I_{GABA_B} = g_{GABA_B} \left( \frac{[G]^4}{[G]^4 + 100} \right) (V - E_{GABA_B})$$

$$\frac{d[G]}{dt} = 0.18[R] - 0.034[G] \quad \frac{d[R]}{dt} = 0.09[T](1 - [R]) - 0.0012[R]$$

215

216

217

218

[T] is the neuro-transmitter concentration. When a pre-synaptic cell sees an action potential the transmitter concentration is increased to 0.5mM and stays there for 0.3ms. [R] represents the fraction of the receptors that are open. [G] is the concentration of the G protein that gets activated upon agonization of the receptors.

$$E_{GABA_B} = -95mV, g_{GABA_B} : RE \Rightarrow HTC = 0.004, RE \Rightarrow TC = 0.004$$

219

*Noise:*

$$I_{EPSP} = -g_s \exp(T(t) - t)(V - 0)$$

220

$$I_{IPSP} = -g_s \exp(T(t) - t)(V + 85)$$

221

where:

$$T(t) = \min \{T_1, T_2, \dots, T_{n-1}, T_n, \dots | t < T(t)\}$$

222

223

224

225

226

227

The difference between the impulse times,  $T_1, T_2, \dots, T_n$  is an exponentially distributed random variable with a mean of 10ms for RE cells, which have  $g_s = 0.02mS/cm^2$  for EPSPs and  $g_s = 0.015mS/cm^2$  for IPSPs. For TC neurons the mean is also 10ms for EPSPs with  $g_s = 1.0mS/cm^2$ , but they are not given any IPSPs.

The HTC cells receive a gaussian distributed white noise through the stochastic Euler-Maruyama integrator:

$$\frac{dV}{dt} = -\Sigma I + \sqrt{dt} \times \xi(t)$$

228

229

230

where  $\xi(t)$  is drawn from a Gaussian distribution with mean 0 and variance 0.1

**Entropy Measure**

$V_i$  is the membrane voltage of the HTC neurons, where  $i \in \{1, 2\}$

$$LFP = \frac{(V_1 + V_2)}{2}$$

231 Before performing the Fourier transformation, we do some basic processing over the  
232 LFP trace. We take a simple moving average over a window of 10ms (we use an  
233 observation frequency of 2.5kHz) and make its mean zero.

$$LFP'_i = \frac{\sum_{k=i-24}^i LFP_k}{25} - \frac{\sum_{j=1}^N LFP_j}{N}$$

234

$$F(\omega) = \frac{1}{2\pi} \int_{-\infty}^{\infty} LFP'(t) e^{i\omega t} dt$$

$$p(\omega) = \frac{|F(\omega)|^2}{\int_0^{\infty} |F(\omega)|^2 d\omega}$$

235  $p(\omega)$  is the the probability distribution function which is used to calculate the  
236 Shannon Entropy

$$entropy = - \int_0^{\infty} p(\omega) \log(p(\omega)) d\omega$$

## 237 Results

### 238 Effect of varying HCN expression on alpha:

239 Diminished expression of HCN channels has been reported in Alzheimer's effected  
240 neurons [17]. It has also been shown that lowered HCN expression can accelerate  
241 amyloid-beta aggregation. HCN channels are crucial in initiating the alpha rhythm (see  
242 Fig2 2). To investigate the disease pathology, we explore the effect of aberrational HCN  
243 expression on the alpha-rhythm by modulating the conductance of the  $I_H$  current ( $g_H$ ).  
244 Control value for the conductance set to around  $\sim 0.36 \text{mS/cm}^2$  in the model gives  
245 robust periodic alpha at 10 Hz [10]. We quantify the periodicity using the entropy of  
246 the FFT of the local field potential (LFP). Probability distribution function (pdf) for the  
247 entropy measure is represented by normalized power spectrum of the LFP (see methods  
248 section for details). Higher values of the entropy imply that the power in the signal is  
249 distributed over various frequencies. A neatly periodic and coherent time series will  
250 exhibit low entropy, as the power would be confined to only a few narrow frequency  
251 regions. For example, see 4CI. (Supplementary information S1 Fig) shows the  
252 relationship between this entropy and variance of peak frequency.

253 Increasing  $g_H$  increases the frequency of HTC firing monotonically (-25% to +20%  
254 change in  $g_H$ ) (3A peak frequency in power spectra in blue). Beyond this regime of  $g_H$ ,  
255 periodicity breaks down and alpha rhythm is lost. This is seen as increase in entropy in  
256 both directions of control value of  $g_H$ . Increased expression of  $I_H$  (higher value of  $g_H$ )  
257 makes the membrane more excitable so that small fluctuations are more likely to cross  
258 threshold causing noisy firing. Decreased expression of  $I_H$  ( $g_H$ ) launches  $I_{THT}$  later.  
259 These changes in  $g_H$  have the effect of reducing the intrinsic bursting timescale of HTC  
260 cells as described in the introduction and moving out of the alpha range. As a result the  
261 HTC activity rate is seen to slow down until  $g_H \sim 0.27 \text{mS/cm}^2$ . At values of  $g_H$   
262  $< 0.27 \text{mS/cm}^2$ , HTC cell membrane is just below firing threshold over longer periods of  
263 time making the system again sensitive to noise. Background noise has longer periods of  
264 opportunity to cause the crossing of firing threshold. Our calculations suggest a high  
265 sensitivity of the alpha rhythm to the HCN expression and a narrow regime of HCN  
266 expression over which periodic activity of HTC cells is possible.

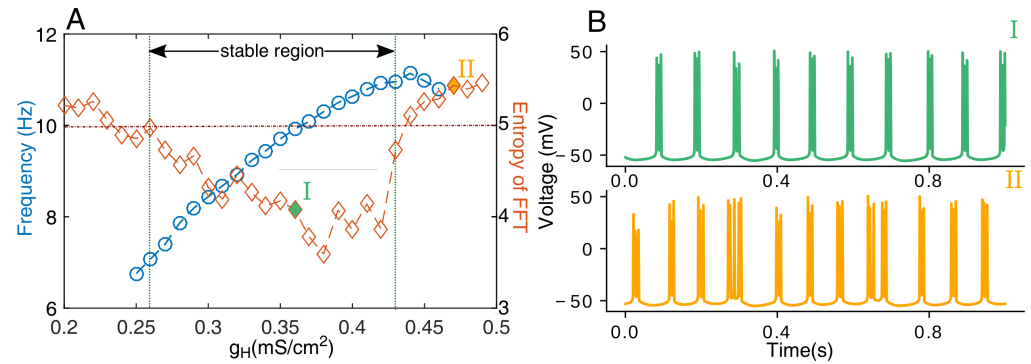

**Fig 3. Monotonic dependence of the peak frequency by varying HCN expression. There is small range of  $g_H$  values that will give rise to a periodic bursting phenomenon.**

(A) Intrinsic oscillation frequency (blue) of HTC cells show monotonic dependence on conductance  $g_H$  of HCN channel in the stable region. However  $I_H$  over expression leads to over excitability in HTC cells and losing periodicity. Low levels of  $I_H$  expression makes the system more sensitive to noise and loss of periodicity. There exists an optimal regime of  $g_H$  where bursting is regular. This is depicted as lower entropy (red) for a range of  $g_H$ . (B) Illustrative voltage traces of HTC cells from I ( $g_H=0.36\text{mS}/\text{cm}^2$ ) and II ( $g_H=0.47\text{mS}/\text{cm}^2$ )

### 267 Limited rescue of the alpha-rhythm with acetylcholine

268 Ambient acetylcholine acts to increase global excitability of HTC cells. This trigger,  
 269 along with the intrinsic properties of these cells, initiates alpha. In AD, reduced HCN  
 270 expression in HTCs leads to lower excitability and delays the activation of the burst  
 271 inducing calcium-current. The chain of events that determine alpha-rhythm time-scale  
 272 now take a longer time to complete. Here we investigate the extent to which increased  
 273 acetylcholine levels can counter the lowered excitability and reinstate alpha. In figure 4  
 274 four case studies of differential HCN expressions (Green: normal, Blue: Increased  
 275 expression, Black: reduced) and its implications on alpha rhythm are described. We  
 276 define  $\eta_{ach}$  as a measure of fractional change in cholinergic activity.

$$\eta_{ach} = \frac{g_{Kleak\_norm} - g_{Kleak\_mod}}{g_{Kleak\_norm}} \times 100 \quad (\%) \quad (\text{Eq:1})$$

277 Where  $g_{Kleak\_norm}$  is the potassium leak which corresponds to a 10Hz alpha rhythm  
 278 and  $g_{Kleak\_mod}$  is the modified potassium leak. Increase in ambient acetylcholine levels  
 279 ( $\eta_{ach}$ ) lead to monotonic increase in alpha frequency over a limited range. As the system  
 280 of HTC cells continue to get more excitable with  $\eta_{ach}$  they inadvertently also become to  
 281 susceptible to noise. Normal HCN expression maintains periodicity upto around 15% in  
 282 crease in  $\eta_{ach}$  (green diamonds). HTC cells with reduced HCN expression of  $\sim 80\%$   
 283 (black diamonds, fig 4A) can tolerate increase up to 28% increase in  $\eta_{ach}$ , beyond which  
 284 there is a loss in periodicity. This is illustrated in Fig 4B bottom figure. The transition  
 285 for cells with lower HCN expression to normal alpha rhythm (rescue) happens at an  
 286 increased value of  $\eta_{ach} = 20\%$ . The loss in periodicity is quantified as an increase in  
 287 entropy, as defined earlier (filled diamonds). Changes in power distribution around the  
 288 alpha band with the healthy, pathological and rescue cases of the alpha-rhythm are  
 289 shown in 4. Our results suggest that rescue by acetylcholine is possible in a limited  
 290 range of reduced HCN levels. Further increase in excitability, with higher value  $\eta_{ach}$   
 291 lead to enhanced sensitivity to noise. Figure 4C describes HTC rhythm and  
 292 corresponding entropy for HCN levels reduced to 45%. For HCN levels as low as these,

293 we see that increases in acetylcholine cannot bring the HTC rhythm up to 10 Hz and  
 294 periodicity is restricted to 9 Hz, beyond which the HTCs lose rhythmicity (see 4C).

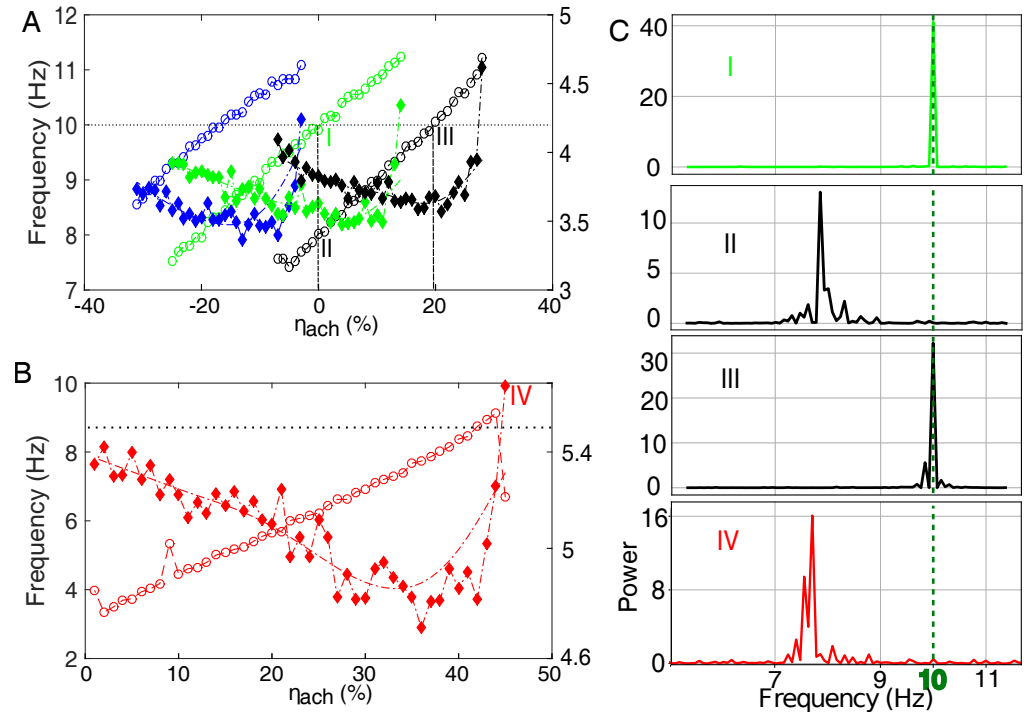

**Fig 4. Rescue of the alpha-rhythm to changing levels of basal [ACh] and HCN channel expression.**

(A) Increasing ambient acetylcholine levels ( $\eta_{ach}$ ) increases the peak frequency of the rhythm (open circles, blue, green and black). When  $I_H$  expression is compromised (78% black open circles) to mimic known observations in AD, peak frequencies remain lower than control (100%  $g_H$ , open green) (II). The lowered coherence of alpha as a result of lower  $g_H$  can be rescued by increasing acetylcholine levels (78%  $g_H$  expression needs 20% increase in acetylcholine (III)). There appears to be a threshold of ambient acetylcholine levels beyond which entropy (filled diamonds) increases dramatically, suggesting loss in periodicity. The overall entropy also remains high for decreased  $g_H$ . (B) When  $I_H$  expression is compromised severely (50% green open circles) lowered frequency of alpha is not rescued by increasing acetylcholine levels. 50%  $g_H$  expression can only achieve periodicity 9 Hz before complete breakdown of regular firing. This is seen as a sudden rise in entropy (closed red diamonds). (C) Power Spectra corresponding to I, II and III from (A) and IV from (B).

295 **Fig4. Rescue of the alpha-rhythm to changing levels of basal [ACh] and**  
 296 **HCN channel expression.**

297 (A) Increasing ambient acetylcholine levels ( $\eta_{ach}$ ) increases the peak frequency of the  
 298 rhythm (open circles, blue, green and black). When  $I_H$  expression is compromised (78%  
 299 black open circles) to mimic known observations in AD, peak frequencies remain lower  
 300 than control (100%  $g_H$ , open green) (II). The lowered coherence of alpha as a result of  
 301 lower  $g_H$  can be rescued by increasing acetylcholine levels (78%  $g_H$  expression needs  
 302 20% increase in acetylcholine (III)). There appears to be a threshold of ambient  
 303 acetylcholine levels beyond which entropy (filled diamonds) increases dramatically,  
 304 suggesting loss in periodicity. The overall entropy also remains high for decreased  $g_H$ .

305 (B)When  $I_H$  expression is compromised severely (50% green open circles) lowered  
306 frequency of alpha is not rescued by increasing acetylcholine levels. 50%  $g_H$  expression  
307 can only achieve periodicity 9 Hz before complete breakdown of regular firing. This is  
308 seen as a sudden rise in entropy (closed red diamonds).  
309 (C)Power Spectra corresponding to I, II and III from (A) and IV from (B).

### 310 Lowering $g_H$ can lead to an enhanced GABA activity

311 Several studies have characterized compromised alpha in AD [20]. So far we have shown  
312 how changes in acetylcholine levels and HCN channel can modulate alpha. Here we  
313 investigate how AD related changes in alpha can influence network dynamics. During  
314 alpha band activity, rest of the brain areas that are not corralled into the oscillations,  
315 are suppressed [21]. This leads to the notion that alpha activity inhibits neuronal firing.  
316 Using the computational model described above we analyze the effect of changing the  
317 alpha frequency on the dynamics of the thalamocortical network. To mimic the AD  
318 condition we diminish HCN expression. As expected, the frequency of HTC firing is seen  
319 to decrease with lowered  $I_H$  conductance( $g_H$ ) 3A. Under these pathological conditions  
320 with lowered alpha, the TC cells that were suppressed via GABAergic drive from the  
321 rhythm generating HTCs are now released from inhibition 1&5. In figure 5A we show  
322 increased TC firing as a result of lowered HTC frequency. The reduced inhibition from  
323 HTCs seems to have a downstream effect on RE cells. The RE cells which receive  
324 enhanced excitatory drive from TC cells, transition to higher firing rates. The increased  
325 response of RE cells to increased excitatory drive from the TC cells is shown in 5B. This  
326 happens despite the decreased drive from HTCs to the REs. HTC cells are 20% of the  
327 total number TC cells(normal TC cells and HTC cells). The larger number of TC(4  
328 times) overrules the synaptic interaction and creates a positive feedback loop. High RE  
329 activity leads to increased inhibition on the HTC cells reducing their frequency further  
330 5. The overall effect is that of increase in GABAergic activity. In support of this insight,  
331 increased presence of neurotransmitter GABA has been reported in AD mice [22]. Our  
332 model suggests that lowered alpha rhythm seen in AD can cause a cascade of changes in  
333 thalamocortical network firing and may ultimately cause increased inhibition.

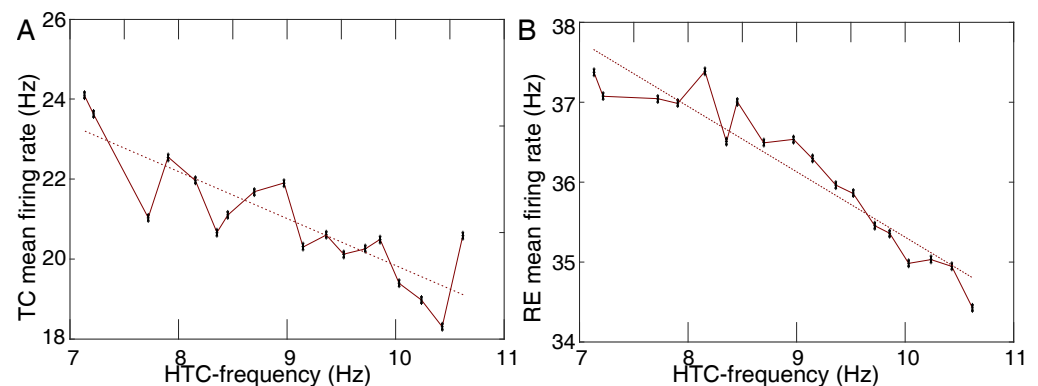

**Fig 5. Increase in inhibitory activity follows a reduction in the HTC-frequency**

A) Inverse relationship between HTC and TC firing. Lower drive from HTCs releases the inhibitory drive (via interneurons) on the TC cells causing increase in activity. B) Inverse relationship between HTC firing and RE firing. Increased activity of the TC cells leads to enhanced RE activity.

### 334 Calcium current and its interaction with HCN expression

335 Disrupted calcium homeostasis is been implicated in several studies in Alzheimer's  
336 affected neurons. Elevated levels of cytosolic calcium are associated with AD and linked  
337 to dysregulation in the calcium signaling within the cell [23]. We simulate the pathology  
338 by changing the high-threshold calcium conductance in the cell (crucial for alpha).  
339 Interestingly, despite the crucial role of calcium in orchestrating the rhythm, individual  
340 HTC cells fire in a small range around alpha in response to as much 50% to 150% of  
341 normal high-threshold calcium conductance ( $g_{THT}$ ). This surprising readout is due to  
342 the narrow frequency repertoire of the HTC cells. However our model suggests that  
343 disruption in alpha caused by changes in calcium arises out of loss in periodicity. In  
344 other words, HTC cells either fire around alpha or loose periodicity. In order to isolate  
345 the effect of the calcium conductance on the alpha-rhythm, we change potassium leak to  
346 strictly maintain the 10Hz frequency for the range of  $g_H$  explored in the figure. As  
347 calcium conductance is changed, HTC cells go through regimes of periodic and irregular  
348 firing. This is shown as sudden transitions in entropy in 6A. Healthy cells  
349 ( $g_H=0.36\text{mS}/\text{cm}^2$ , 6A, green) appear robust and can tolerate as much as a 25% increase  
350 in the calcium conductance before losing periodicity. On the other hand decreasing  $g_H$   
351 values to simulate the pathological condition of lowered HCN expression shows lower  
352 tolerance for changes in calcium conductance. This heightened sensitivity to calcium is  
353 shown as narrower troughs in entropy (windows of regular firing) for pathologically  
354 lower expression of HCN shown in orange and blue. 6A also describes response to  
355 increase HCN (red and purple). The overall effect follows the same trend of increased  
356 tolerance to changes in calcium which corresponds with HCN expression. We summarize  
357 this in 6B. The entire range from -50% to +50% change in calcium conductance is  
358 shown. Lowered HCN expression corresponds with shrinking regimes of periodic firing 6.

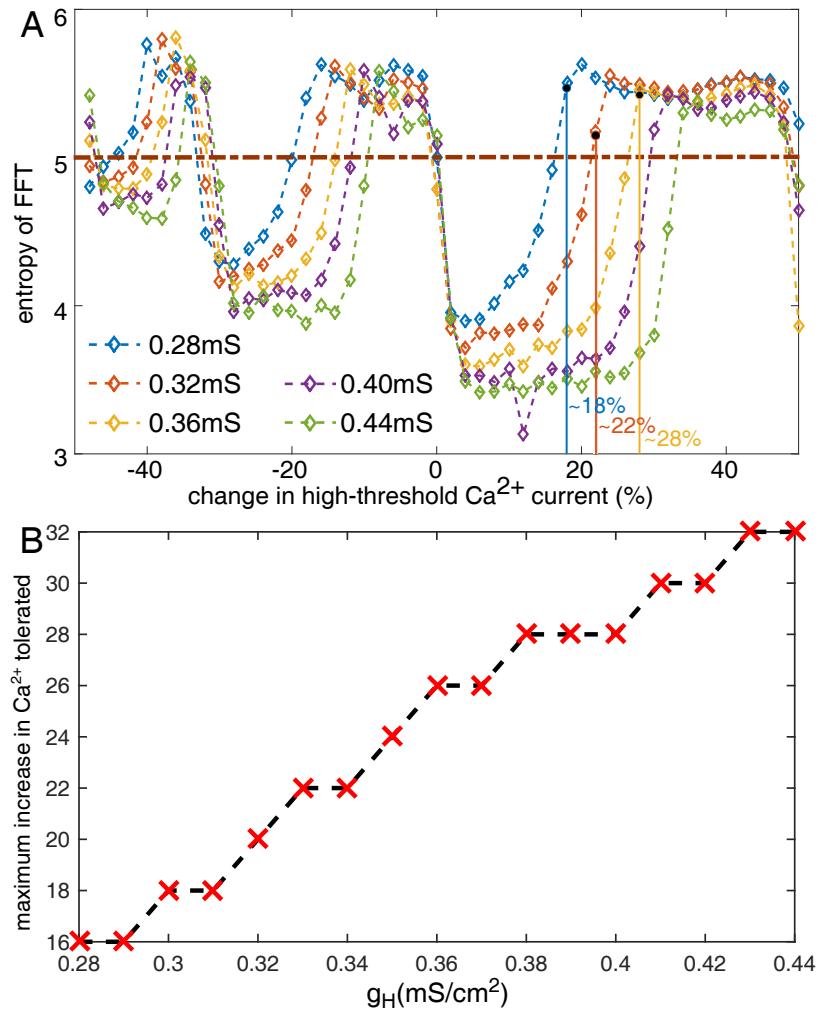

**Fig 6. Lowered HCN makes Alpha more sensitive to small changes in the calcium conductance**

A) Systematically varying the calcium conductance in both directions leads to sudden increases in the entropy describing incoherent firing of the HTC cells. These are regimes of calcium conductance over which the HTC cells show aperiodic activity. Coloured lines show deviations from normal HCN expression levels. Lower HCN expression has lowered tolerance for changes calcium. Higher HCN gives a broader range of calcium conductance where we see periodic firing. B) Finer illustration of higher sensitivity of pathological HCN expression to changes in calcium.

## 359 Discussion

360 Alzheimer's disease(AD) is a multifaceted catastrophic disease that implicates multiple  
 361 brain areas, resulting in a range of debilitating symptoms, making it difficult to arrive  
 362 at a nodal cause. While precise molecular mechanisms that underlie the constellation of  
 363 deficits and the causal links between them are not completely clear, however  
 364 biochemical and electrophysiological markers have been observed. Several apparently  
 365 independent hypotheses have been proposed to delineate the root pathology and the  
 366 consequent pathogenesis.

367 The most prominent of these is toxic effects of accumulation amyloid-beta plaques  
368 and Tau fibrils, a characteristic feature of AD [24]. While amyloid-beta and tau-fibrils  
369 disrupt a wide array of signaling pathways in the brain, that include cell death, we do  
370 not yet have a clear understanding of the biochemistry that leads to their accumulation  
371 and proliferation. It has been suggested that reduced HCN expression and  
372 down-regulated HCN channel activity could be leading to increased amyloid- $\beta$   
373 aggregation.

374 The calcium hypothesis of Alzheimer's suggests that dysfunctional regulation of the  
375 calcium signaling by modifying synaptic plasticity and other signaling cascades,  
376 profoundly vitiates neural functions like memory formation and consolidation. However  
377 its not known how small changes in the calcium signaling cause drastic changes in  
378 behavior [23]. We demonstrate in this work how changes in the parameters that govern  
379 calcium dynamics can lead to irregular activity in the thalamus 6. Reduced HCN  
380 expression, associated with AD, can make the network more sensitive to deviations in  
381 calcium signaling.

382 The cholinergic hypothesis proposes reduced release acetylcholine as the leading  
383 cause of symptoms of AD. In support of this, the most prevalent drugs administered to  
384 AD patients that provide temporary symptomatic relief are acetylcholinesterase(Ache)  
385 inhibitors [25,26]. EEG tools that are used to diagnose AD, report a reduction in power  
386 and frequency of alpha compared to control subjects [27] [13]. This evidence suggests  
387 compromised acetylcholine signaling in AD. Results described here quantify the  
388 differential ways by which changes in ambient acetylcholine can modulate this rhythm.  
389 However in light of the role of HCN expression in AD and the insights from the model,  
390 we hypothesize that it is not aberrant acetylcholine signaling itself that is the cause of  
391 AD symptoms.

392 Alpha is essentially orchestrated by action of ambient acetylcholine that depolarizes  
393 the membrane and in turn gets HCN channels and calcium channels to generate the  
394 characteristic 10 Hz burst. Reduced HCN expression and over-expression of beta  
395 amyloid are key observations in AD cells [17]. We clearly demonstrate how reduction of  
396 HCN channel expression can make the cell more susceptible to background noise with  
397 minor deviations in the calcium current 6. In view of reduced power and coherence seen  
398 in the alpha band of AD patients, our predictions connect changes in calcium to  
399 aberrant HCN expression in AD. Using some of the known observations linked to AD  
400 and a biophysically detailed computational model that generates alpha, we illuminate  
401 the possible causal relationships between key markers associated with AD (Beta  
402 Amyloid, HCN expression and Acetylcholine hypothesis) 7.

## 403 **Analysis of causal relationships between HCN expression,** 404 **alpha-rhythm and amyloid-beta aggregation**

405 In AD transgenic mice cognitive decline is observed before amyloid-beta plaques are  
406 visible. Drugs, like Sildenafil, which enhances HCN activation, temporarily restore  
407 cognitive function without affecting the amyloid-beta load [28]. This suggests that  
408 alternate bio-chemical pathologies, apart from beta-amyloid plaques, can explain the  
409 early impairment of cognition. Alpha-rhythm disruption is reported in early stage  
410 Alzheimer's [13]), along with a loss in spatial cognitive abilities. The hippocampal  
411 theta-rhythm is known to play a crucial role in learning and spatial  
412 navigation [29] [30] [31]. The theta rhythm has also been shown to have critical  
413 dependence on HCN channels. [32] These investigations, taken together, point towards  
414 the need to investigate the the possibility of an HCN channel pathology in early stage  
415 Alzheimer's.

416 We explore the space of all possible causal relationships between amyloid-beta( $A\beta$ ),



417 HCN channel expression( $H$ ) and alpha-rhythms( $\alpha$ ) to explore the various correlations  
 418 that have been reported in literature. We have established that lowering the HCN  
 419 channel expression reduces the alpha-rhythm frequency and coherence 3. The first box  
 420 in 7 lists all the possibilities, where it is not the case that the alpha-rhythm( $\alpha$ ) is  
 421 effected by  $I_H$  current channels( $H$ ). Given the insights from our model (monotonic  
 422 relationship between HCN expression and alpha peak frequency 3), these relationships  
 423 are eliminated. In studies where the HCN channels were knocked out, Saito et al.  
 424 report increased amyloid-beta beta aggregation when compared to wild type (WT)  
 425 neurons [17]. They also show that using an HCN channel blocker(ZD7288) in WT also  
 426 leads to similar levels of amyloid-beta accumulation as the KO neurons. Postmortem  
 427 studies of AD patient brains have lower levels of HCN channels, when compared to  
 428 non-AD subjects [17]. Using these observations, the relationships described in the  
 429 second box, 7, can be eliminated. Revelations from our model combined with  
 430 experimental observations shrinks the list of relationships to merely three possible  
 431 causal links and is illustrated in the third box in 7. HCN channel expression effects  
 432 both the alpha rhythm and Amyloid- $\beta$  directly. However it is not not clear if there is a  
 433 directional direct link between amyloid- $\beta$  and the alpha rhythm.

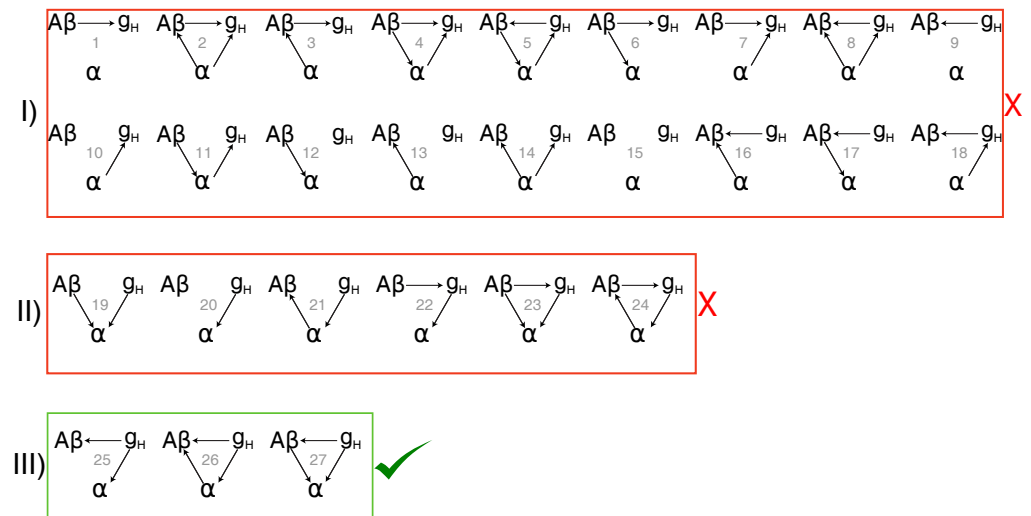

**Fig 7. Potential causality between amyloid-beta plaques ( $A\beta$ ), HCN channels( $g_H$ ) and the alpha-rhythm( $\alpha$ ).**

- I) HCN expression directly effects the alpha-rhythm: elimination of the possibilities where this is not the case.  
 II): Appearance of beta-amyloid plaques and lowered expression of HCN channels are strongly correlated and therefore not independent pathologies. It has been established that HCN channels activity effects amyloid-beta: elimination of box II possibilities [17].  
 III) Three remaining possibilities in the causal relationships

#### 434 Mechanisms for loss in coherence:

435 We characterize two distinct mechanisms that lead to loss in coherence and lower power  
 436 in alpha as observed in AD. First we describe coherence loss with reduced  $g_H$  ( $3 g_H <$   
 437  $0.26 \text{ mS/cm}^2$ ).

438 Since rise in  $I_H$  dictates the inter-burst interval, lower  $g_H$  increases the ISI and  
 439 extends the the time spent by the membrane voltage close to the threshold of high  
 440 threshold calcium channels. This increases the probability of background noise to cross  
 441 the threshold causing a noisier alpha. Second, loss in coherence with increased

442 acetylcholine is due to increased cell excitability. We demonstrate how excessive  
443 cholinergic modulation in the thalamo-cortical network leads to a sudden loss of  
444 coherence  $4A(\eta_{ach} > 15\%)$ . Under these circumstances a random background  
445 signal has a lower barrier to cross the threshold. This way the exact time of initiating  
446 the burst underlying the alpha rhythm becomes unreliable. The same mechanism also  
447 underlies the loss in coherence with increasing  $g_H(3 g_H > 0.43 \text{mS/cm}^2)$ . Under healthy  
448 physiological conditions, the HCN expression lies within a sweet spot, in a regime where  
449 it does not spend too much time near the calcium current threshold, and at the same  
450 time has a substantial barrier to cross to reach the threshold. This allows for a robust  
451 10 Hz burst to be precisely orchestrated, that is predominantly unaffected by noise.

#### 452 **Alpha-rhythm relation to overall firing rates and extracellular GABA:**

453 A recent AD study reports abnormally high levels of the neurotransmitter GABA in the  
454 extracellular space [22] implicating enhanced GABAergic drive in the pathology. In  
455 support of this, temporary rescue of cognition in mice by reducing the inhibitory effect  
456 of GABA is reported. [22] Our model illustrates clearly that higher GABA levels can be  
457 a direct down stream effect of reduced HTC firing frequency and lower alpha rhythm  
458 (See figure 5). Our model predicts that higher GABA levels, a downstream effect of a  
459 slower alpha-frequency in AD may further result in a runaway affect of slowing down  
460 activity and exacerbate pathology 5.

461 The alpha-rhythm is often associated with a suppression of overall neuronal firing  
462 rates. [21] A lower alpha then would imply release from this suppression and increase in  
463 the overall firing rates. Our model provides an insight into the paradoxical effect of  
464 release from inhibition and increase in GABA. Reduction in HCN expression, that  
465 mimics AD pathology, corals other neurons in the network to enhanced activity and  
466 changes the global firing rates. 5 Around half the neurons in the network are GABA  
467 releasing RE cells. They show an increase in their activity, along with the glutamatergic  
468 TC neurons. This shows how reduced alpha-frequency can lead to both increased  
469 GABA levels and increased neural firing rates.

## 470 **Conclusion**

471 Using an alpha rhythm generating network model of the thalamus and its disruption in  
472 AD, we have systematically elucidated the causal links between various known  
473 pathologies associated with Alzheimer's Disease. We hypothesize that HCN pathology  
474 precedes alpha rhythm disruption and may underly early cognitive deficiency in the  
475 disease. Our results illustrate limitations of therapeutic intervention of enhancing  
476 acetylcholine and downstream effects of enhanced GABA activity. Mimicking increased  
477 calcium flux as seen in AD results in global changes in network firing rate and loss of  
478 coherence. When the HCN pathology is simulated, the AD network is overtly sensitive  
479 to changes in calcium signaling. Changes in brain rhythm is an early pathological  
480 signature in AD, this paradigm can contribute to our understanding of a nodal cause of  
481 the disease.

## 482 **Acknowledgments**

483 SN funded by Wellcome DBT India Alliance intermediate fellowship and  
484 Indian Institute of Science Education and Research - Pune.  
485 RS is funded by Department of Science and Technology INSPIRE fellowship,  
486 Indian Institute of Science Education and Research - Pune and  
487 Wellcome DBT India Alliance.

## References

1. Rihs TA, Michel CM, Thut G. Mechanisms of selective inhibition in visual spatial attention are indexed by  $\alpha$ -band EEG synchronization. *European Journal of Neuroscience*. 2007;25(2):603–610.
2. Buzsaki G. *Rhythms of the Brain*. Oxford University Press; 2006. Available from: <https://books.google.co.in/books?id=ldz58irprjYC>.
3. Fisahn A, Pike FG, Buhl EH, Paulsen O. Cholinergic induction of network oscillations at 40 Hz in the hippocampus in vitro. *Nature*. 1998;394(6689):186–189. Available from: <http://www.nature.com/doifinder/10.1038/28179>.
4. Lőrincz ML, Crunelli V, Hughes SW. Cellular dynamics of cholinergically induced alpha (8-13 Hz) rhythms in sensory thalamic nuclei in vitro. *The Journal of neuroscience : the official journal of the Society for Neuroscience*. 2008;28(3):660–671.
5. Bollimunta A, Chen Y, Schroeder CE, Ding M. Neuronal Mechanisms of Cortical Alpha Oscillations in Awake- behaving Macaques. *The journal of Neuroscience*. 2009;28(40):9976–9988.
6. Rapid distributed fronto- parieto-occipital processing stages during working memory in humans. *Cereb Cortex*. 2002;12:710–728.
7. Magnetoencephalographic 10-Hz rhythm from the human auditory cortex. *Neuroscience Letters*. 1991;129:303–305.
8. Spatiotemporal characteristics of sensorimotor neuro- magnetic rhythms related to thumb movement. *Neuroscience*. 1994;60:537–550.
9. Haegens S, Nacher V, Luna R, Romo R, Jensen O.  $\alpha$ -Oscillations in the monkey sensorimotor network influence discrimination performance by rhythmical inhibition of neuronal spiking. *Proceedings of the National Academy of Sciences of the United States of America*. 2011;108(48):19377–82. Available from: <http://www.pnas.org/content/108/48/19377.abstract>.
10. Vijayan S, Kopell NJ. Thalamic model of awake alpha oscillations and implications for stimulus processing. *Proceedings of the National Academy of Sciences*. 2012;2012:1–6.
11. Krishnan GP, Chauvette S, Shamie I, Soltani S, Timofeev I, Cash SS, et al. Cellular and neurochemical basis of sleep stages in the thalamocortical network. *eLife*. 2016;5(November 2016):1–29.
12. Friston KJ, Bastos AM, Pinotsis D, Litvak V. LFP and oscillations-what do they tell us? *Current Opinion in Neurobiology*. 2015;31:1–6.
13. Vitiello MV. Dominant occipital ( alpha ) rhythm frequency in early stage Alzheimer ' s disease and depression. *Sciences-New York*. 1989;98195:427–432.
14. Crunelli V, David F, Lőrincz ML, Hughes SW. The thalamocortical network as a single slow wave-generating unit. *Current Opinion in Neurobiology*. 2015;31:72–80. Available from: <http://linkinghub.elsevier.com/retrieve/pii/S0959438814001792>.

15. Kunz L, Schröder TN, Lee H, Montag C, Lachmann B, Sariyska R, et al. No Title. *Science*. 2015;350(6529):430–433. Available from: <http://www.sciencemag.org/content/350/6259/430.full.html>.
16. Giocomo LM, Hussaini SA, Zheng F, Kandel ER, Moser MB, Moser EI. Grid cells use HCN1 channels for spatial scaling. *Cell*. 2011;147(5):1159–1170. Available from: <http://dx.doi.org/10.1016/j.cell.2011.08.051>.
17. Saito Y, Inoue T, Zhu G, Kimura N, Okada M, Nishimura M, et al. Hyperpolarization-activated cyclic nucleotide gated channels: a potential molecular link between epileptic seizures and A $\beta$  generation in Alzheimer's disease. *Molecular neurodegeneration*. 2012;7(1):50. Available from: <http://www.molecularneurodegeneration.com/content/7/1/50>.
18. Zou X, Coyle D, Wong-Lin K, Maguire L. Beta-amyloid induced changes in A-type K<sup>+</sup> current can alter hippocampo-septal network dynamics. *Journal of Computational Neuroscience*. 2012;32(3):465–477.
19. McCormick DA, Prince DA. Acetylcholine induces burst firing in thalamic reticular neurones by activating a potassium conductance. *Nature*. 1986;319(6052):402–405.
20. Vitiello G. The use of many-body physics and thermodynamics to describe the dynamics of rhythmic generators in sensory cortices engaged in memory and learning. *Current Opinion in Neurobiology*. 2015;31:7–12. Available from: <http://dx.doi.org/10.1016/j.conb.2014.07.017>.
21. Klimesch W. Alpha-band oscillations, attention, and controlled access to stored information. *Trends in Cognitive Sciences*. 2012;16(12):606–617. Available from: <http://dx.doi.org/10.1016/j.tics.2012.10.007>.
22. Wu X, Foster DJ. Hippocampal replay captures the unique topological structure of a novel environment. *The Journal of Neuroscience*. 2014;34(19):6459–69. Available from: [http://www.ncbi.nlm.nih.gov/entrez/query.fcgi?cmd=Retrieve&db=PubMed&dopt=Citation&list={\\_}uids=24806672&delimiter="026E30F\\$nhhttp://www.jneurosci.org/content/34/19/6459.abstract.html?etoc](http://www.ncbi.nlm.nih.gov/entrez/query.fcgi?cmd=Retrieve&db=PubMed&dopt=Citation&list={_}uids=24806672&delimiter=).
23. Berridge MJ. Calcium regulation of neural rhythms, memory and Alzheimer's disease. *The Journal of physiology*. 2014;592(Pt 2):281–93. Available from: <http://www.pubmedcentral.nih.gov/articlerender.fcgi?artid=3922493&tool=pmcentrez&rendertype=abstract>.
24. Binder LI, Guillozet-Bongaarts AL, Garcia-Sierra F, Berry RW. Tau, tangles, and Alzheimer's disease. *Biochimica et Biophysica Acta - Molecular Basis of Disease*. 2005;1739(2):216–223.
25. Selkoe DJ. Alzheimer's Disease—Genotypes, Phenotype, and Treatments. *Science*. 1997;275(5300):630–631. Available from: <http://science.sciencemag.org/content/275/5300/630>.
26. Kumar A, Singh A, Ekavali. A review on Alzheimer's disease pathophysiology and its management: An update. *Pharmacological Reports*. 2015;67(2):195–203. Available from: <http://dx.doi.org/10.1016/j.pharep.2014.09.004>.
27. Hughes SW, Crunelli V. Thalamic mechanisms of EEG alpha rhythms and their pathological implications. *The Neuroscientist : a review journal bringing neurobiology, neurology and psychiatry*. 2005;11(4):357–372.

28. Cuadrado-Tejedor M, Hervias I, Ricobaraza A, Puerta E, Pérez-Roldán JM, García-Barroso C, et al. Sildenafil restores cognitive function without affecting  $\beta$ -amyloid burden in a mouse model of Alzheimer's disease. *British Journal of Pharmacology*. 2011;164(8):2029–2041.
29. Kleshchevnikov aM. Synaptic plasticity in the hippocampus during afferent activation reproducing the pattern of the theta rhythm (theta plasticity). *Neuroscience and behavioral physiology*. 1999;29(2):185–96. Available from: <http://www.ncbi.nlm.nih.gov/pubmed/10432508>.
30. Larson J, Wong D, Lynch G. Patterned stimulation at the theta frequency is optimal for the induction of hippocampal long-term potentiation. *Brain Research*. 1986;368(2):347 – 350. Available from: <http://www.sciencedirect.com/science/article/pii/0006899386905792>.
31. Eva Pastalkova, Vladimir Itskov, Asohan Amarasingham, and Gyorgy Buzsaki. Internally Generated Cell Assembly Sequences in the Rat Hippocampus. *Science*. 2008;321(5894):1322–1327.
32. Varga V, Hangya B, Kránitz K, Ludányi A, Zemankovics R, Katona I, et al. The presence of pacemaker HCN channels identifies theta rhythmic GABAergic neurons in the medial septum. *Journal of Physiology*. 2008;586(16):3893–3915.

## Supporting Information

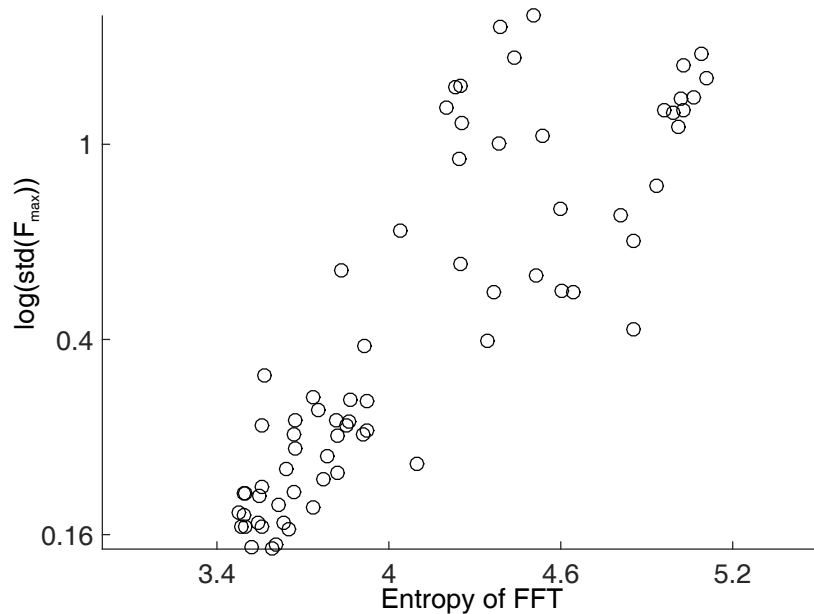

**Fig 8. Standard deviation of the peak frequency increases with increase in entropy of FFT**

Illustration of the relationship between entropy of FFT with the standard deviation of the peak frequency. The log of the standard deviation is plotted against the entropy.
